# Supplementary material for: Protective effects of Oxya chinensis sinuosa Mishchenko against ultraviolet B-induced photodamage in hairless mice
Source: Springer Nature journal article supplement (doi:10.1186/s12906-019-2692-4), 2019-10-28
Supplement: MOESM1 [file 17319578]

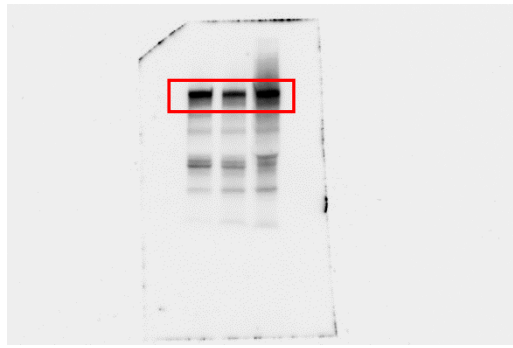

**proCOL**

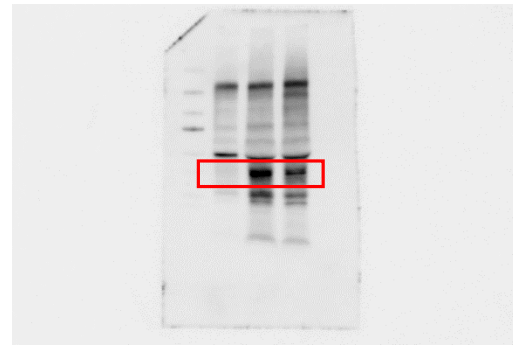

**MMP-1**

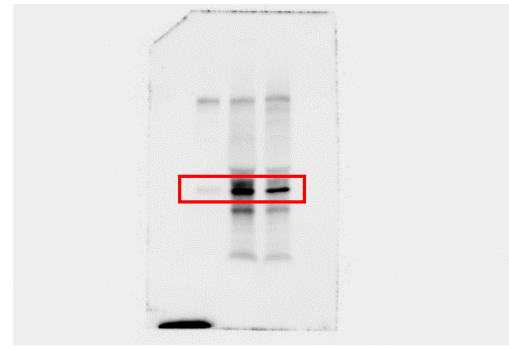

**MMP-9**

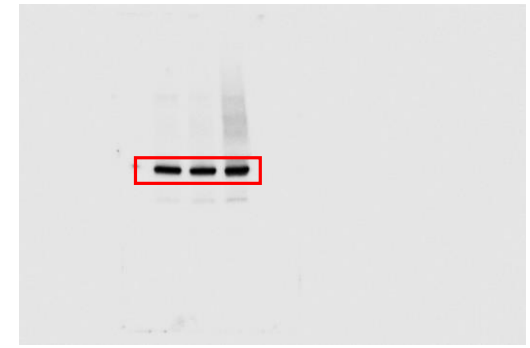

**actin**

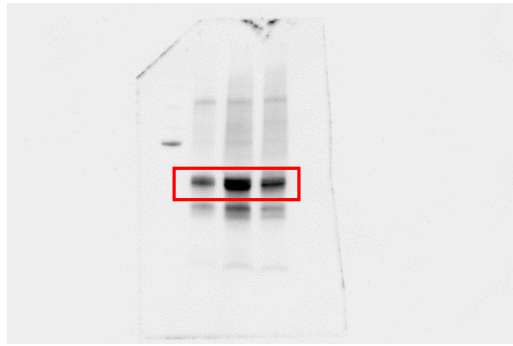

**pERK**

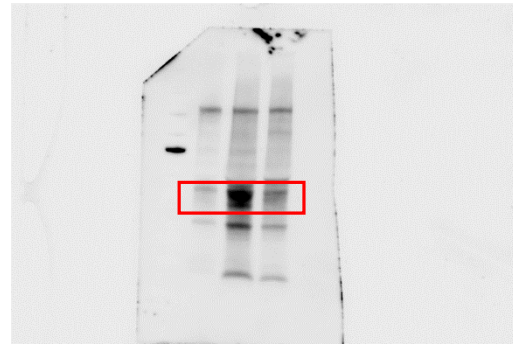

**pMEK**

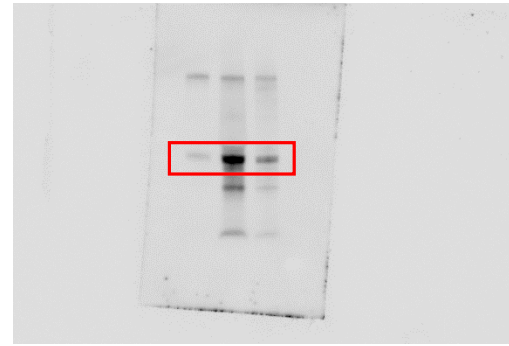

**pp38**

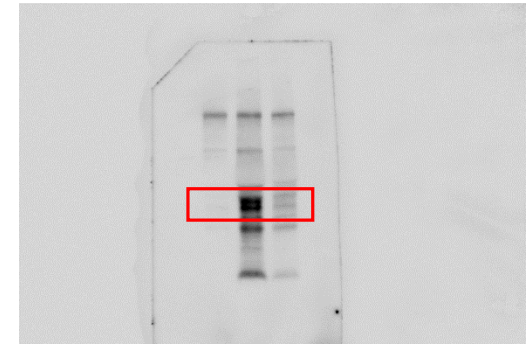

**pJNK**

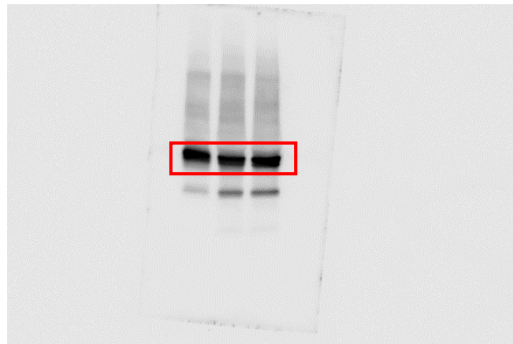

**ERK**

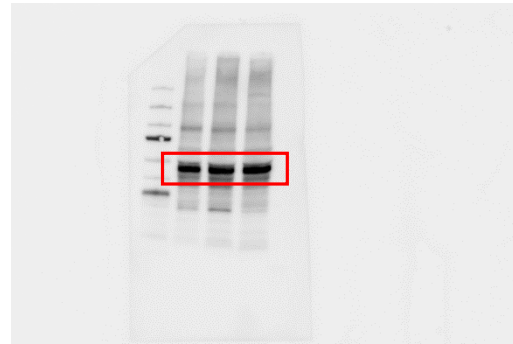

**MEK**

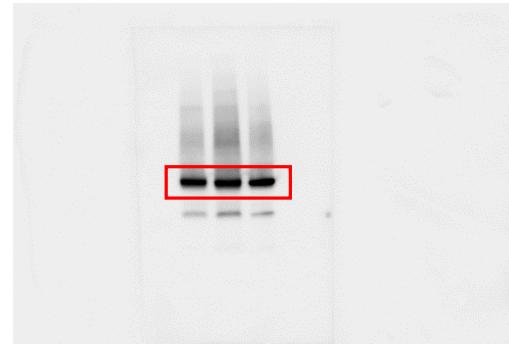

**p38**

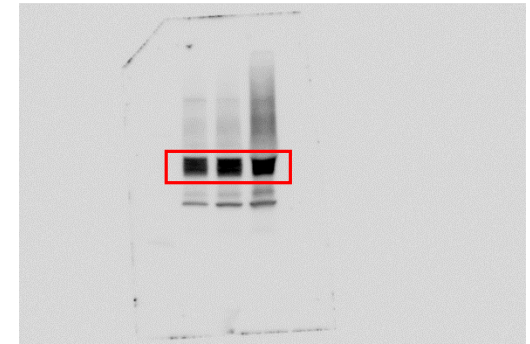

**JNK**
